# Supplementary material
Source: PubMed Central journal article supplement (PMC11028470)
Supplement: 262_2014_1543_MOESM1_ESM.pdf [file 262_2014_1543_MOESM1_ESM.pdf]

## Salmonella-Mediated Tumor Regression Involves Targeting of Tumor Myeloid Suppressor Cells causing a Shift to M1-like Phenotype and Reduction in Suppressive Capacity

Suneesh Kaimala, Yassir A. Mohamed, Nancy Nader, Jincy Issac, Eyad Elkord, Salem Chouaib, Maria J. Fernandez-Cabezudo, and Basel K. al-Ramadi

### Supplementary Figure 1

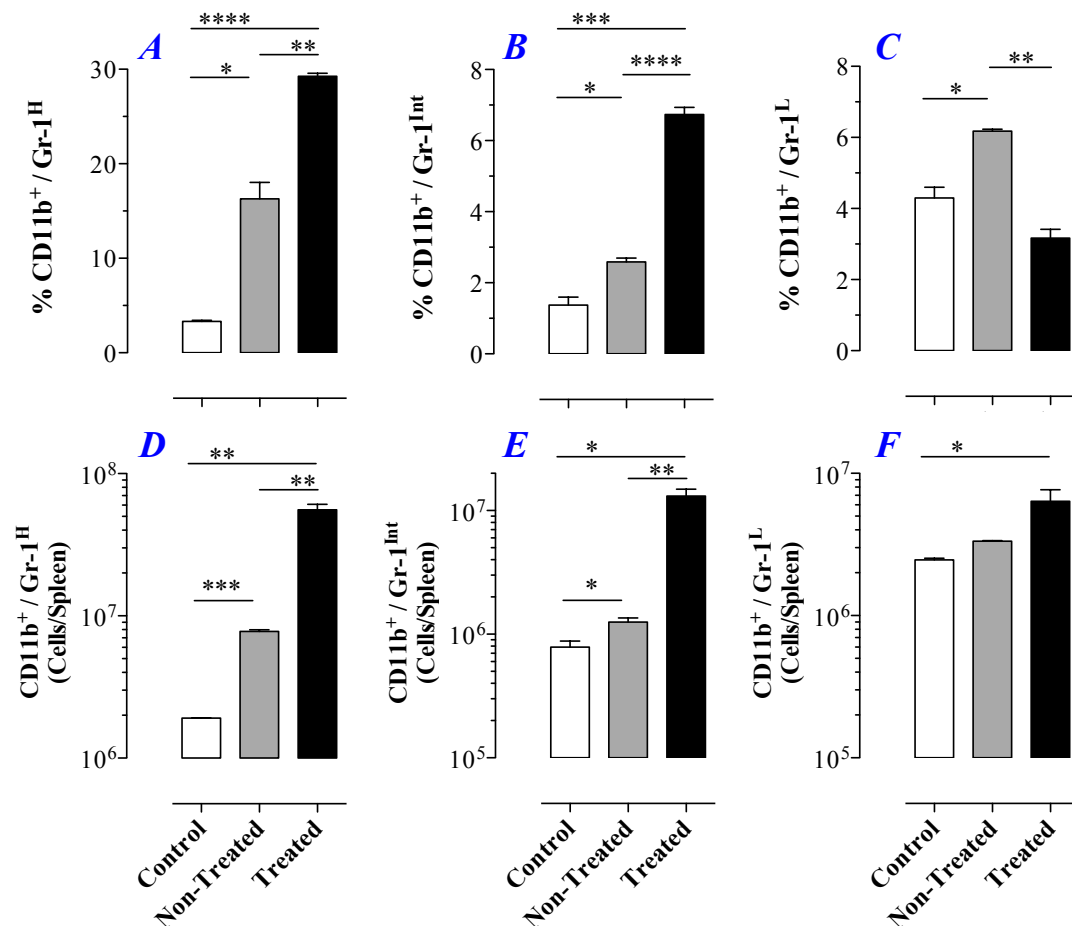

**SFigure 1.** Selective expansion of Gr-1<sup>+</sup> splenic myeloid cells following Salmonella treatment. The percentage (panels *A-C*) and absolute cell counts (panels *D-F*) of CD11b<sup>+</sup>Gr-1<sup>high</sup> (panels *A, D*), CD11b<sup>+</sup>Gr-1<sup>inter</sup> (panels *B, E*), and CD11b<sup>+</sup>Gr-1<sup>low</sup> (panels *C, F*) were determined by FACS staining with specific mAbs in non-treated or Salmonella-treated mice at day 8 post treatment. Each data point represents the mean ± SEM of 3 mice per group. Asterisks denote statistically significant differences between the indicated groups (\*\*\*\*,  $p < 0.0001$ ; \*\*\*,  $p < 0.001$ ; \*\*,  $p < 0.01$ ; \*,  $p < 0.05$ ). The results are representative of 3 independent experiments.

## Supplementary Figure 2

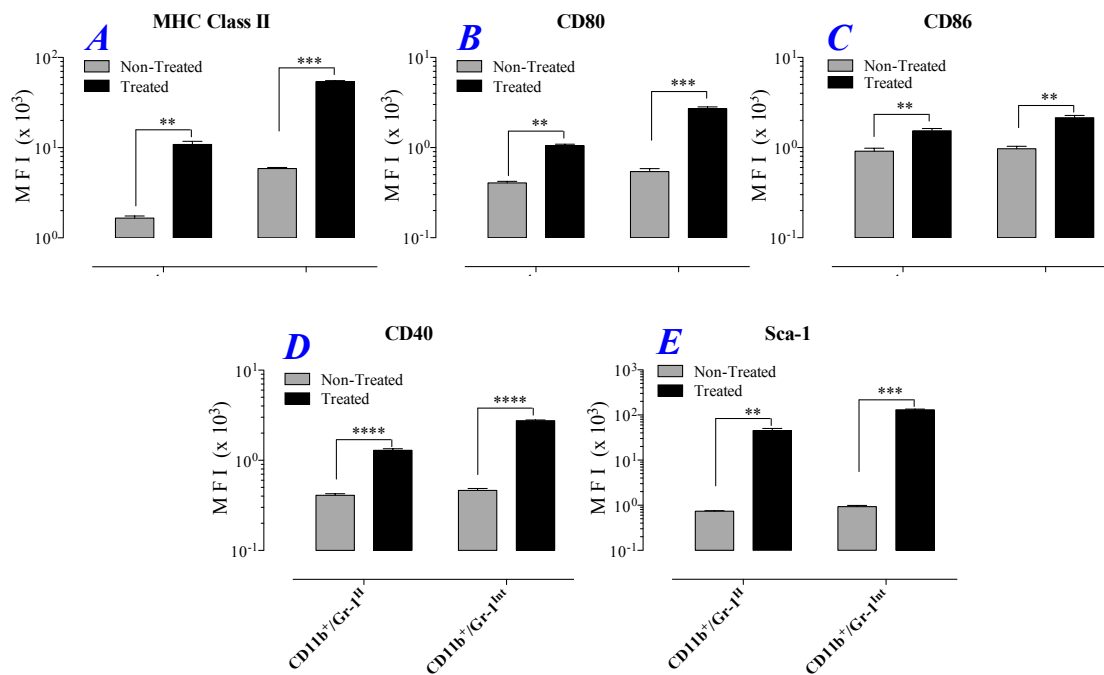

**SFigure 2.** Upregulation of myeloid activation markers on splenic cells after Salmonella-treatment. This analysis is based on the FACS staining profiles shown in Figure 3. The data are depicted as the mean fluorescent intensity (MFI) of MHC class II (panel **A**), CD80 (panel **B**), CD86 (panel **C**), CD40 (panel **D**) and Sca-1 (panel **E**) proteins on CD11b<sup>+</sup>Gr-1<sup>high</sup> and CD11b<sup>+</sup>Gr-1<sup>Inter</sup> myeloid populations in non-treated or at day 8 post Salmonella treatment. Asterisks denote statistically significant differences between the non-treated and Salmonella-treated groups for each myeloid subpopulation (\*\*\*\*,  $p < 0.0001$ ; \*\*\*,  $p < 0.001$ ; \*\*,  $p < 0.01$ ). The results are representative of 3 independent experiments.

### Supplementary Figure 3

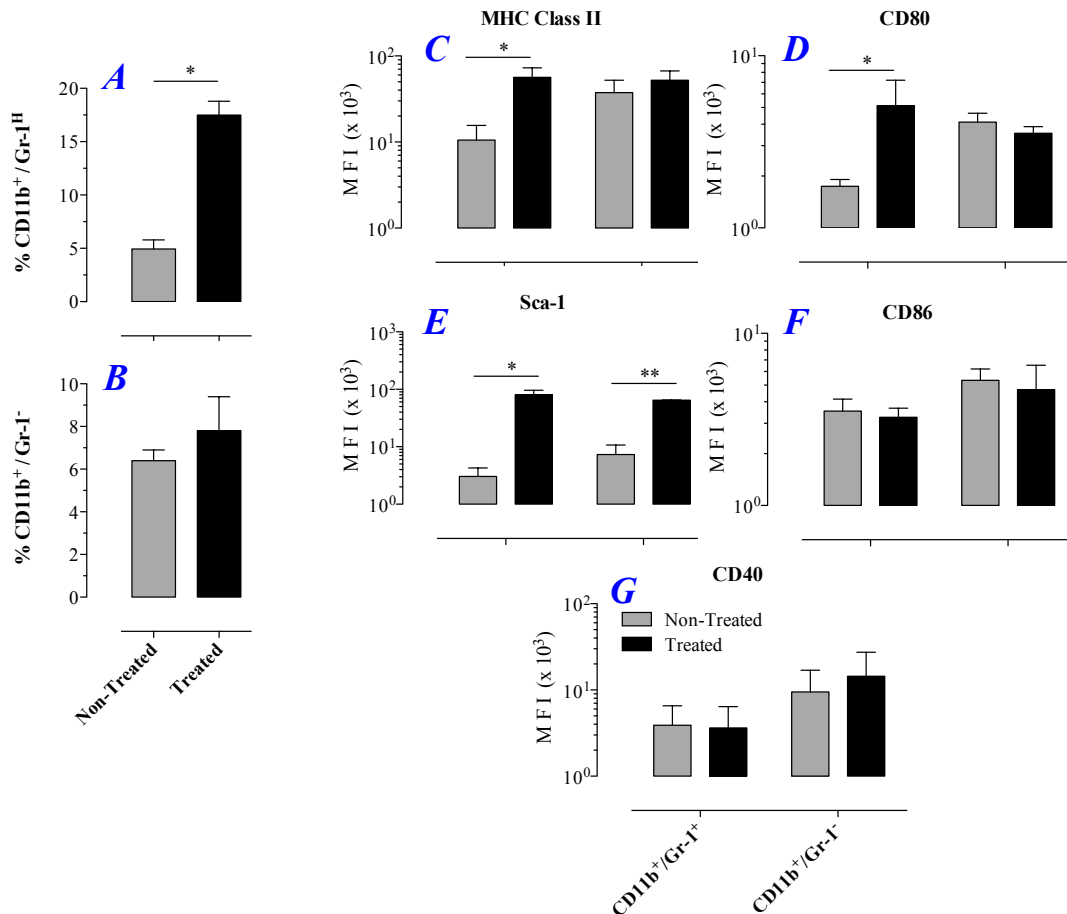

**SFigure 3.** Expansion and activation profile of Gr-1<sup>+</sup> myeloid cells in tumor tissue following Salmonella treatment. The percentages of CD11b<sup>+</sup>Gr-1<sup>+</sup> (panel **A**) and CD11b<sup>+</sup>Gr-1<sup>-</sup> (panels **B**) among tumor infiltrating cells were determined by staining with specific mAbs in non-treated or Salmonella-treated mice at day 8 post treatment. Each data point represents the mean  $\pm$  SEM of 3 mice per group. (**C-G**) Expression of myeloid activation markers MHC class II, CD80, CD86, Sca-1, and CD40, respectively, on intratumoral myeloid cells. The data are depicted as the mean fluorescent intensity of each of the indicated proteins on CD11b<sup>+</sup>Gr-1<sup>+</sup> and CD11b<sup>+</sup>Gr-1<sup>-</sup> myeloid populations in non-treated or Salmonella-treated mice. Asterisks denote statistically significant differences between the non-treated and Salmonella-treated groups for each myeloid subpopulation (\*\*,  $p < 0.01$ ; \*,  $p < 0.05$ ). The results are representative of 2 independent experiments.
